# Supplementary material
Source: publisher figshare collection journal article supplement (https://gsajournals.figshare.com/ndownloader/files/26557628)
Supplement: Supplementary file 1 [file 26557628]

## Sheet: Sheet1
Table S9. EggNOG gene mapping of sex chromosome seven.
Allocated EggNOG Category	Number of annotated genes (#)	Proportion of annotated genes (%)
Information Storage and Processing
Transcription	28	16.47
RNA processing and modification	9	5.29
Replication, recombination and repair	8	4.71
Other	9	5.29
Cellular Processes and Signalling
Signal transduction mechanisms	42	24.71
Posttranslational modification, protein turnover & chaperones	18	10.59
Intracellular trafficking, secretion, and vesicular transport	15	8.82
Cell wall/membrane/envelope biogenesis	3	1.76
Cell cycle/ control/ division/ chromosome partitioning	3	1.76
Extracellular structures	2	1.18
Defense mechanisms	1	0.59
Cytoskeleton	1	0.59
Metabolism
Inorganic ion transport and metabolism	8	4.71
Carbohydrate transport and metabolism	7	4.12
Lipid transport and metabolism	5	2.94
Other	11	6.47
Summary
Function unknown	167	49.55
GO annotated	170	50.45
Allocation of gene orthology to Hermetia illucens gene annotations of the sex chromosome using the EggNOG database.
